# Supplementary material for: Estimating the Hidden Burden of Bovine Tuberculosis in Great Britain
Source: PLoS Comput Biol. 2012 Oct 18;8(10):e1002730. doi: 10.1371/journal.pcbi.1002730 (PMC3475695; doi:10.1371/journal.pcbi.1002730)
Supplement: Dataset S1 — Target and auxiliary distributions necessary for simulation and parameterization of models using ABC-SMC. (ZIP) [file pcbi.1002730.s001.zip]

Archive with 16 entries (15 files):
- BreakdownLength.csv
- Data Description.pdf
- __MACOSX/
- __MACOSX/._Data Description.pdf
- PersistenceTargets.csv
- PTI1_Times.csv
- PTI2_Times.csv
- PTI4_Times.csv
- ReactorsAtFirstTest.csv
- ReactorsAtVE12M.csv
- ReactorsAtVE6M.csv
- SIT.csv
- TotalReactors.csv
- Turnover.csv
- VE-12M.csv
- VE-6M.csv
