# Supplementary material for: Estimating the Hidden Burden of Bovine Tuberculosis in Great Britain
Source: PLoS Comput Biol. 2012 Oct 18;8(10):e1002730. doi: 10.1371/journal.pcbi.1002730 (PMC3475695; doi:10.1371/journal.pcbi.1002730)
Supplement: Dataset S1 — Target and auxiliary distributions necessary for simulation and parameterization of models using ABC-SMC. (ZIP) [file pcbi.1002730.s001.zip › PersistenceTargets.csv]

Herd Size "PTI" "Confirmed" "Breakdowns" "Prolonged" "Recur 6M" "Recur 12M" "Recur 24M" "Slaughterhouse"
30 1 0 185 11 7 14 20 NA
90 1 0 191 9 6 20 50 NA
150 1 0 118 9 9 19 42 NA
210 1 0 74 8 3 15 26 NA
270 1 0 43 3 5 9 18 NA
330 1 0 26 7 3 4 13 NA
30 1 1 362 77 10 29 72 77
90 1 1 386 130 30 70 123 106
150 1 1 270 113 34 70 115 82
210 1 1 184 97 21 48 82 57
270 1 1 131 68 17 42 80 35
330 1 1 100 63 13 32 56 38
30 2 0 43 2 1 2 5 NA
90 2 0 66 7 0 3 9 NA
150 2 0 55 6 3 9 20 NA
210 2 0 42 4 1 6 12 NA
270 2 0 25 3 5 7 11 NA
330 2 0 12 4 1 1 1 NA
30 2 1 78 16 3 8 14 34
90 2 1 84 25 2 8 20 33
150 2 1 66 33 3 10 22 27
210 2 1 43 30 6 16 19 11
270 2 1 35 20 4 9 17 12
330 2 1 21 12 3 5 11 12
30 4 0 29 0 0 1 1 NA
90 4 0 49 3 0 1 3 NA
150 4 0 46 3 0 3 8 NA
210 4 0 41 5 2 2 6 NA
270 4 0 18 1 1 5 7 NA
330 4 0 16 1 0 1 2 NA
30 4 1 29 5 3 6 7 20
90 4 1 37 11 2 6 7 26
150 4 1 36 13 0 2 7 23
210 4 1 30 14 0 1 1 14
270 4 1 28 12 2 5 8 14
330 4 1 16 7 1 1 2 6
