# Supplementary material for: Estimating the Hidden Burden of Bovine Tuberculosis in Great Britain
Source: PLoS Comput Biol. 2012 Oct 18;8(10):e1002730. doi: 10.1371/journal.pcbi.1002730 (PMC3475695; doi:10.1371/journal.pcbi.1002730)
Supplement: Dataset S1 — Target and auxiliary distributions necessary for simulation and parameterization of models using ABC-SMC. (ZIP) [file pcbi.1002730.s001.zip › PTI1_Times.csv]

363 1176 363 517 356 356 398 361 322 363 365 669 406 364 368 371 350 392 376 875 357 364 714 363 359 862 372 1121 553 358 350 350 379 344 1036 371 371 784 390 742 419 449 706 1266 693 372 372 385 371 399 854 364 456 351 372 200 538 364 350 1106 377 343 553 1092 791 372 357 351 393 609 449 399 364 946 363 560 364 365 355 350 391 421 322 379 343 420 344 357 71 371 371 1043 375 355 896 420 378 364 2…
