# Supplementary material for: Estimating the Hidden Burden of Bovine Tuberculosis in Great Britain
Source: PLoS Comput Biol. 2012 Oct 18;8(10):e1002730. doi: 10.1371/journal.pcbi.1002730 (PMC3475695; doi:10.1371/journal.pcbi.1002730)
Supplement: Dataset S1 — Target and auxiliary distributions necessary for simulation and parameterization of models using ABC-SMC. (ZIP) [file pcbi.1002730.s001.zip › PTI2_Times.csv]

742 890 763 939 1134 738 742 1436 1358 727 1490 714 1477 848 1114 414 1407 1182 952 1210 1487 413 1470 1113 1401 854 930 622 1246 840 806 770 721 867 1442 1225 393 428 483 777 682 791 839 972 1285 756 834 1099 358 370 1708 1001 1002 903 438 1106 1113 763 1067 1071 791 1051 1329 1071 735 1014 938 790 1106 658 1085 903 1218 970 791 1155 1071 783 970 309 686 182 1218 812 364 322 482 854 1035 727 118…
