# Supplementary material for: Estimating the Hidden Burden of Bovine Tuberculosis in Great Britain
Source: PLoS Comput Biol. 2012 Oct 18;8(10):e1002730. doi: 10.1371/journal.pcbi.1002730 (PMC3475695; doi:10.1371/journal.pcbi.1002730)
Supplement: Dataset S1 — Target and auxiliary distributions necessary for simulation and parameterization of models using ABC-SMC. (ZIP) [file pcbi.1002730.s001.zip › PTI4_Times.csv]

1526 1470 1485 1375 753 1495 1525 1470 1512 1491 1522 1476 1442 1629 1576 1476 476 176 899 358 1456 1463 1478 1400 273 511 1196 1456 1069 1505 1470 1463 1618 1460 1476 1519 1422 2135 1656 1456 868 1452 1445 1268 867 1553 1670 1401 1395 1379 1467 1519 1442 1392 1544 1421 1462 1456 1449 1813 1683 1498 1477 1513 1512 1611 1504 1490 1413 379 1526 71 1729 1456 1477 1504 1581 1463 1491 1456 1421 1449 1…
