# Supplementary material for: Estimating the Hidden Burden of Bovine Tuberculosis in Great Britain
Source: PLoS Comput Biol. 2012 Oct 18;8(10):e1002730. doi: 10.1371/journal.pcbi.1002730 (PMC3475695; doi:10.1371/journal.pcbi.1002730)
Supplement: Dataset S1 — Target and auxiliary distributions necessary for simulation and parameterization of models using ABC-SMC. (ZIP) [file pcbi.1002730.s001.zip › SIT.csv]

69 63 68 67 63 63 64 77 80 78 63 63 63 62 70 78 77 99 73 77 21 64 62 70 88 90 69 63 63 63 64 69 69 70 62 63 7 63 84 77 84 64 147 63 63 63 6 57 71 66 70 90 7 62 84 119 94 35 70 70 70 64 67 21 63 67 64 106 28 71 127 112 63 27 78 63 63 63 80 62 70 63 69 63 3 69 69 64 67 36 146 63 63 62 63 11 62 63 91 49 64 63 70 102 466 98 63 62 62 66 84 67 70 150 62 63 71 63 126 63 63 70 273 64 62 70 84 70 73 74 74…
