# Supplementary material for: Estimating the Hidden Burden of Bovine Tuberculosis in Great Britain
Source: PLoS Comput Biol. 2012 Oct 18;8(10):e1002730. doi: 10.1371/journal.pcbi.1002730 (PMC3475695; doi:10.1371/journal.pcbi.1002730)
Supplement: Dataset S1 — Target and auxiliary distributions necessary for simulation and parameterization of models using ABC-SMC. (ZIP) [file pcbi.1002730.s001.zip › TotalReactors.csv]

Herd Size "PTI" "Confirmed" "Breakdowns" "1" "2" "3" "4" "5" "6" "7" "8" "9" "10" "11" "12" "13" "14" "15" "16" "17" "18" "19" "20" "21" "22" "23" "24" "25" "26" "27" "28" "29" "30" "31" "32" "33" "34" "35" "36" "37" "38" "39" "40" "41" "42" "43" "44" "45" "46" "47"
30 1 0 184 140 28 10 3 2 0 1 0 0 0 0 0 0 0 0 0 0 0 0 0 0 0 0 0 0 0 0 0 0 0 0 0 0 0 0 0 0 0 0 0 0 0 0 0 0 0 0
90 1 0 191 119 44 13 8 5 0 0 0 1 0 1 0 0 0 0 0 0 0 0 0 0 0 0 0 0 0 0 0 0 0 0 0 0 0 0 0 0 0 0 0 0 0 0 0 0 0 0
150 1 0 117 65 28 4 6 7 2 0 0 3 0 0 1 0 0 0 0 0 0 0 0 0 0 0 0 0 0 0 1 0 0 0 0 0 0 0 0 0 0 0 0 0 0 0 0 0 0 0
210 1 0 73 38 13 9 5 3 1 2 0 0 1 0 0 0 0 0 0 0 1 0 0 0 0 0 0 0 0 0 0 0 0 0 0 0 0 0 0 0 0 0 0 0 0 0 0 0 0 0
270 1 0 43 21 7 8 2 1 0 1 0 1 0 1 0 1 0 0 0 0 0 0 0 0 0 0 0 0 0 0 0 0 0 0 0 0 0 0 0 0 0 0 0 0 0 0 0 0 0 0
330 1 0 25 9 5 4 3 1 0 1 1 0 1 0 0 0 0 0 0 0 0 0 0 0 0 0 0 0 0 0 0 0 0 0 0 0 0 0 0 0 0 0 0 0 0 0 0 0 0 0
30 1 1 312 117 69 44 24 20 8 6 2 3 2 3 3 1 4 0 2 0 0 1 0 1 0 1 0 0 0 1 0 0 0 0 0 0 0 0 0 0 0 0 0 0 0 0 0 0 0 0
90 1 1 344 96 55 40 29 24 24 12 13 10 6 3 4 3 2 3 1 4 4 0 1 2 0 1 1 1 0 1 1 0 0 1 0 0 0 0 0 0 0 0 0 1 0 1 0 0 0 0
150 1 1 236 39 34 22 19 18 18 10 13 10 7 7 7 4 1 0 1 2 2 2 1 3 2 3 1 0 1 1 0 2 0 0 0 0 0 0 0 0 2 0 0 0 2 1 0 0 1 0
210 1 1 163 18 23 19 10 11 10 10 3 3 9 6 4 6 2 2 5 1 2 1 0 2 4 2 0 1 1 2 1 0 1 0 1 0 1 0 1 0 0 0 0 0 1 0 0 0 0 0
270 1 1 115 9 22 10 8 4 3 2 7 8 2 3 5 4 3 0 2 4 1 1 1 2 1 1 1 2 2 0 1 1 2 1 0 1 0 0 1 0 0 0 0 0 0 0 0 0 0 0
330 1 1 88 10 5 9 6 7 3 3 1 4 3 1 4 0 2 3 2 2 2 4 1 0 1 1 2 0 1 0 0 0 0 2 0 1 0 1 0 1 1 2 0 0 1 0 2 0 0 0
30 2 0 40 32 3 0 3 2 0 0 0 0 0 0 0 0 0 0 0 0 0 0 0 0 0 0 0 0 0 0 0 0 0 0 0 0 0 0 0 0 0 0 0 0 0 0 0 0 0 0
90 2 0 66 45 9 9 0 2 0 0 0 0 0 0 0 0 0 0 0 0 0 0 1 0 0 0 0 0 0 0 0 0 0 0 0 0 0 0 0 0 0 0 0 0 0 0 0 0 0 0
150 2 0 54 26 13 5 4 1 2 1 1 0 0 0 0 0 0 1 0 0 0 0 0 0 0 0 0 0 0 0 0 0 0 0 0 0 0 0 0 0 0 0 0 0 0 0 0 0 0 0
210 2 0 40 18 4 6 6 0 1 3 2 0 0 0 0 0 0 0 0 0 0 0 0 0 0 0 0 0 0 0 0 0 0 0 0 0 0 0 0 0 0 0 0 0 0 0 0 0 0 0
270 2 0 25 13 3 4 1 1 0 0 0 0 0 0 0 0 1 0 0 0 0 0 1 1 0 0 0 0 0 0 0 0 0 0 0 0 0 0 0 0 0 0 0 0 0 0 0 0 0 0
330 2 0 12 5 4 1 0 1 0 0 1 0 0 0 0 0 0 0 0 0 0 0 0 0 0 0 0 0 0 0 0 0 0 0 0 0 0 0 0 0 0 0 0 0 0 0 0 0 0 0
30 2 1 60 23 10 7 5 3 3 2 3 1 1 1 0 1 0 0 0 0 0 0 0 0 0 0 0 0 0 0 0 0 0 0 0 0 0 0 0 0 0 0 0 0 0 0 0 0 0 0
90 2 1 66 16 12 11 5 2 2 1 2 3 2 0 4 1 0 3 0 0 0 0 0 0 0 0 0 0 0 0 1 0 0 0 1 0 0 0 0 0 0 0 0 0 0 0 0 0 0 0
150 2 1 59 10 9 4 5 2 5 1 2 2 3 1 1 1 0 1 0 0 1 2 1 1 1 2 0 0 1 0 0 1 0 0 0 0 0 0 1 0 0 0 0 0 0 0 0 1 0 0
210 2 1 41 5 8 3 3 4 1 2 1 0 0 1 0 0 3 0 1 0 0 1 0 1 2 0 1 0 0 0 1 0 0 0 0 1 0 0 0 0 0 0 0 0 0 0 2 0 0 0
270 2 1 34 2 4 5 6 1 1 1 1 1 1 0 0 3 0 0 1 0 2 2 0 0 1 0 0 1 0 0 0 0 0 0 0 1 0 0 0 0 0 0 0 0 0 0 0 0 0 0
330 2 1 17 2 3 1 0 2 0 0 1 2 1 0 1 0 0 1 0 0 0 1 1 0 0 0 0 0 0 0 0 0 0 0 0 1 0 0 0 0 0 0 0 0 0 0 0 0 0 0
30 4 0 29 26 1 1 0 1 0 0 0 0 0 0 0 0 0 0 0 0 0 0 0 0 0 0 0 0 0 0 0 0 0 0 0 0 0 0 0 0 0 0 0 0 0 0 0 0 0 0
90 4 0 49 35 11 0 1 0 1 1 0 0 0 0 0 0 0 0 0 0 0 0 0 0 0 0 0 0 0 0 0 0 0 0 0 0 0 0 0 0 0 0 0 0 0 0 0 0 0 0
150 4 0 46 30 7 2 4 0 1 0 1 0 0 0 0 0 0 0 0 0 0 0 0 0 1 0 0 0 0 0 0 0 0 0 0 0 0 0 0 0 0 0 0 0 0 0 0 0 0 0
210 4 0 41 20 8 8 2 1 0 1 0 0 0 0 0 0 0 0 0 0 0 0 0 0 0 0 0 0 0 0 0 1 0 0 0 0 0 0 0 0 0 0 0 0 0 0 0 0 0 0
270 4 0 18 13 0 3 1 0 0 0 0 0 1 0 0 0 0 0 0 0 0 0 0 0 0 0 0 0 0 0 0 0 0 0 0 0 0 0 0 0 0 0 0 0 0 0 0 0 0 0
330 4 0 15 4 3 1 3 0 1 0 0 0 1 0 0 0 0 0 0 0 1 0 1 0 0 0 0 0 0 0 0 0 0 0 0 0 0 0 0 0 0 0 0 0 0 0 0 0 0 0
30 4 1 14 6 3 2 0 0 0 1 0 0 0 0 1 0 0 0 1 0 0 0 0 0 0 0 0 0 0 0 0 0 0 0 0 0 0 0 0 0 0 0 0 0 0 0 0 0 0 0
90 4 1 24 12 1 1 2 0 0 1 1 0 0 0 1 0 0 0 1 1 0 0 1 0 0 0 0 0 0 0 0 0 0 0 0 0 0 0 0 0 0 0 0 0 1 1 0 0 0 0
150 4 1 22 8 5 0 1 2 1 0 0 1 0 0 0 0 0 0 1 1 0 0 0 0 0 0 1 0 0 0 0 0 0 0 0 0 0 1 0 0 0 0 0 0 0 0 0 0 0 0
210 4 1 23 6 6 1 0 1 2 1 1 1 0 1 0 1 0 0 0 0 0 0 0 0 0 0 0 0 0 0 0 0 0 0 0 0 0 0 0 0 0 0 0 0 0 1 1 0 0 0
270 4 1 21 8 0 0 1 0 2 3 2 0 0 2 0 0 0 0 0 0 0 0 0 0 0 0 1 0 1 0 1 0 0 0 0 0 0 0 0 0 0 0 0 0 0 0 0 0 0 0
330 4 1 14 0 5 2 1 0 0 1 2 0 0 0 0 0 2 0 1 0 0 0 0 0 0 0 0 0 0 0 0 0 0 0 0 0 0 0 0 0 0 0 0 0 0 0 0 0 0 0
