# Supplementary material for: Estimating the Hidden Burden of Bovine Tuberculosis in Great Britain
Source: PLoS Comput Biol. 2012 Oct 18;8(10):e1002730. doi: 10.1371/journal.pcbi.1002730 (PMC3475695; doi:10.1371/journal.pcbi.1002730)
Supplement: Dataset S1 — Target and auxiliary distributions necessary for simulation and parameterization of models using ABC-SMC. (ZIP) [file pcbi.1002730.s001.zip › Turnover.csv]

0.295414581360747
0.307294590959215
1
1
0.553985498280086
0.38319048935582
0.555446558978048
0.391484515863727
0.940135602768389
0.517949638613499
0.428305753189707
0.278582161120326
1
0.477712480546329
0.397811691638259
1
0.858921856683971
1
0.372186664024572
0.584841075794621
0.982805460030334
0.327006229707659
0.612558124822067
0.371757336419963
0.508062264878302
0.272415441864333
0.851766287583868
0.375740631017627
0.3016437691265
0.308889777638826
0.528288261250827
0.229300366156148
0.907875740707488
0.321015613091479
0.575838572831556
0.306243942959989
0.437144872187255
0.488814770328404
0.321612138615375
0.309861035662152
0.374466453674121
0.373416822854546
0.521054129027669
0.672204559291078
0.307547697880857
0.65256703388069
0.550026010057222
1
0.427136708341873
0.443429933466768
0.900918500466866
0.755395683453238
0.522533167495854
0.395012955342174
1
0.47819475745138
0.365541886788421
0.783569667463486
0.622998874736414
0.700885931952153
0.47592202676085
1
1
0.585686006753681
0.62351278003075
0.376539358313356
0.499494091116505
0.386356163435303
0.455817195200876
0.306049297125072
0.355821267673476
0.31300846836351
0.735858072262586
0.320321093779345
0.405664736741961
0.560815838844578
0.400889714298054
0.365878646125297
0.384828737821916
0.357710651828299
0.794820870137708
0.334130676585617
0.737085781658886
0.322508632109275
0.284719966590877
0.564595216651656
0.382250128996156
0.883529734173746
0.521456013544312
0.444457468839136
0.422555837735701
0.474804338871344
0.477395196776309
0.510476819006765
0.383689675163824
0.538156928669152
0.497366232326033
1
0.544706756985281
0.39617227585622
0.465505322825937
1
0.458999646558506
0.497773299385521
0.733624454148472
0.888695652173913
0.438961038961039
0.326502449458359
0.890116412500693
0.345782999002549
0.398707596448642
0.740279384286858
0.326316751454595
0.494261010851274
0.361243661378251
0.307685049400238
0.321782178217822
1
0.801524454795681
0.34837414505474
0.671423717295277
0.46191609777786
0.833435210990355
0.333860970161398
0.749408091136808
0.467375923693727
0.67833547944585
0.589061022619827
0.382479136215757
0.596945908162168
0.700615718942412
0.657659073055774
0.506378132118451
1
0.849782243641378
0.584389410760034
0.497133660997782
0.384122463510146
0.399008674101611
0.443316378225138
0.586368912719032
0.37914236266906
0.47009085184852
0.434862463330641
1
0.406277480890212
0.442301661962998
0.460315548596893
0.284421591238484
0.439593023969366
0.614342464809755
0.278256051386765
0.459796109111931
0.434804205646163
0.390997510714194
0.360039564787339
1
0.473142171512371
0.316346240635436
0.669938650306748
0.855131321515385
0.509442535943436
0.532259417736387
0.393887347513983
1
0.684631901329916
1
0.961640071858819
0.705013287689744
0.387981479897871
0.394260212391687
0.386008053361202
0.554015154021771
0.293355720064107
0.360877497153504
0.583754619992353
0.275308702872458
0.456905913713101
0.433984006704613
0.378538765217454
0.398506383061915
0.694030299222579
0.344076639217611
0.443986167871738
0.369411189836306
0.377308707124011
0.280897678007893
0.294694089588892
0.344946931241348
0.409117379859769
0.448278529060048
0.319987821131829
0.260924564633786
0.257042760474157
0.60709126919125
1
0.416940710469336
0.661927591337411
1
0.579431582798187
0.397094372510461
0.398668857154893
0.361575522582874
0.463459436569748
0.68641782903452
0.615333810336287
0.332996571392206
0.358145485561106
0.325328798326682
0.521695915514832
0.41071746031746
0.499813181886116
0.389298248572193
0.323661166512842
0.360325316704097
0.301996370235935
0.463527721543786
0.384706845985151
0.327286098952588
1
0.326482775940731
0.325599045863602
0.257610775066072
0.317261952258484
0.257305573709271
0.407816030838761
0.33913268763203
0.339827352234118
1
0.255546194889076
0.661488869177682
0.549820657790747
0.371085172772449
0.301778610771114
0.577183075082761
0.533964412638336
0.456613538853589
0.520711810479843
0.383711870268288
0.709922849930672
0.495272358286057
0.322321763340327
1
0.404893109782311
0.345632363838004
0.585812662967173
0.385790967212554
0.479439257759236
1
0.480186498544949
0.355407501005112
0.525097663448073
0.647034425549564
1
0.743620711807786
0.47973723614935
0.433822366131227
0.594173782019086
0.352583294641285
0.531071634707882
0.429172195110981
0.277576194346912
0.365141339996876
0.494628338050586
0.335015950299832
0.589586965175495
0.417201102410429
0.382811601347465
0.355192832272516
1
0.504684065030889
0.600317158261973
0.462303328069252
0.9380411382957
0.316527280897827
0.348757256382799
0.404289262707244
0.3359299974934
0.44662995017047
0.473245218089087
0.278109783089863
0.296769775139824
0.487785701025411
0.526935399746666
0.720015415531148
0.662424189018854
0.416386971879675
0.495851097969101
0.935951379149135
0.406818589628566
0.633930718769956
0.51105564448303
0.47419557330942
0.257330199183471
0.502667016615857
0.497634651273816
0.358512673001913
0.826116402726343
0.517510227293574
0.396946564885496
0.931362915543794
0.595121622077528
0.574230310526083
0.440344775442311
0.587553884426214
0.310294268080608
0.355408513213637
0.223991384946733
0.283897288216943
0.386064868235564
0.770954329093605
0.726063829787234
1
0.46970813660706
0.262644660520638
0.449202158190793
0.94947581784047
0.354302937027062
0.375976290928738
0.380646731634318
0.470218781262233
0.760359724916241
0.382182324067512
0.694115234775477
0.616893779005
0.338184493745869
0.415013089751404
0.374356554791579
0.421695629278568
0.444888888888889
0.302572175205083
0.34254170062483
0.713220486583574
0.442837776773611
0.361269761777393
0.420397019984582
0.350865428942626
0.520160049245922
0.365360384410037
0.416707336067702
0.555113106837245
0.292839903459372
0.290645858435175
0.341397832252447
0.442527635182163
0.429731373307820
0.408901031905525
0.929715436160942
0.361379995035989
0.501954980786533
0.454866036776318
0.337165437853424
0.950208716782754
0.674373569626196
0.352408642472253
0.465139571227519
0.515339717647687
0.84162306506589
0.340014592502056
0.483275087368947
0.377751045568721
0.308979156856428
0.458451241517675
0.272784835490723
0.421316927021889
0.665003967804104
0.42591496858691
0.434875294270805
0.972884230722634
0.415638483847172
0.449460343051637
0.439468774009439
0.520251086431676
0.465760182530139
0.56455489385885
0.368483212417749
0.493030350849508
0.295302177586534
0.267574885579932
0.365885961544269
0.29975367581706
1
0.378837242977121
0.282243473765831
0.712507528608713
0.917672035437973
0.438356668106896
0.514214236979759
0.394569998865599
0.795387977125854
0.391623914200614
0.722265000296156
0.638103161397671
1
0.284372386283214
0.335324358860064
0.449801994567809
0.752089523294205
0.465587712384758
0.210032312663487
0.49451940593448
0.282572459122407
0.691029900332226
0.417145369496119
0.454619943518555
0.404963296940791
1
1
0.789759166847472
0.349003855392503
0.754740691405808
0.358250410588349
0.478277886497065
0.557549234135667
0.432513254648156
0.507223594580433
0.962851984172717
0.334622223476617
0.405522232422171
0.477915922791792
0.588786674740571
1
0.32663461325416
0.536096245236974
0.32286282306163
0.467335137142554
0.452370257239541
0.495002524272411
1
0.925713423955142
0.619293826505811
0.446221651440413
0.345975817450727
1
0.339096048062055
0.510954954040776
0.491504444694498
0.304327678656804
0.433825691062078
0.407496820476890
0.535189178592433
0.600653629788374
0.580320937164246
1
0.613008020209056
0.332497553246027
0.321806346623271
0.464285714285714
0.535619603551015
0.333004039930349
0.508557457212714
0.442489410231346
1
0.613403147663326
0.379170586958095
0.335509067074503
0.361015604337477
0.647740656153915
0.826855123674912
0.25165349249879
0.261524249980378
0.440290301297559
0.410722017397694
0.345426421325337
0.327064498904458
0.318149100257069
0.288806372782380
0.726038422507611
0.548895423358215
0.466169291067868
0.819132718717622
0.405541751698665
0.325070153088217
0.431878249031233
0.414082258800116
1
0.538072652478555
1
0.38955711066585
0.204726667181314
0.681330408489951
0.403738376157502
1
0.35883445287604
0.346440594321166
1
0.420709480484841
0.277008486380264
0.527871739677392
0.407244820474571
0.573496552909497
0.617329633055813
0.343136194347000
0.425240775624508
0.470694183864916
0.397590026159069
0.303970223325062
0.510662177328844
0.500866705981165
0.585343977038299
0.374644176253323
0.572512297753808
0.559116446418286
0.332505328611035
0.295970709586292
0.326566555431961
0.398612885563059
0.379450097379648
0.489491072853833
0.315573202642841
0.426067324522463
0.306419735012078
0.367412956499532
0.480028942715597
0.324882540580462
0.462816407619493
0.380455331432319
0.458887613634293
0.400935464653637
0.508561404598165
0.448656495658605
1
0.268206834399850
0.391057977745916
0.331800535529711
0.37719695187069
1
0.516620042784269
0.358244209697526
0.438456603427734
0.374191619004897
0.405124390058168
0.822585778852887
0.381868040662121
0.655774367894639
0.435065297384287
0.208818493918126
0.478017495255339
0.377748280439242
0.832178323926556
0.351695272813191
0.386399566273184
0.497020375760783
0.341449283359314
0.45762840452166
0.309331590129106
0.650953703992758
0.682248865448301
0.300766694474238
0.733181146770512
0.398510463990467
0.445188487760873
0.438871473354232
0.543658088235294
0.307871136017842
0.422510952184820
0.689946443791423
0.352937242970343
0.398690729396182
0.47157445511355
0.328555368184373
0.401443753759775
0.306773887698845
0.402820928761926
0.650085990210345
0.379243748729417
0.449150831220694
0.435843230267719
1
0.380820594493688
0.221041445270988
0.447463143279121
0.38939147533685
0.448723216906369
0.567184068306888
0.385214388834659
0.535350931724107
0.467998212382688
0.386006095049831
0.562978029195534
0.375475747264083
0.391224442912934
0.32615823235923
0.444662138032913
0.357018308631212
0.706198235809036
0.420838734540868
0.50056257032129
0.650087065231951
1
0.861132003227262
0.384784378081140
0.289877563688935
0.310249307479224
0.518642195385272
0.389415524619468
0.364868936426635
0.292351506955969
0.494122907882969
0.92493334501621
0.341504187776129
0.398287345385347
0.890801374542414
0.526306735097629
0.409067438823136
0.449347252598589
0.323033481242436
0.645722460658083
0.536456717344089
1
0.317908268398859
0.254964063832379
0.980641735450066
0.608911643939778
0.423660600349451
0.389380530973451
0.488881366666485
0.4537710367754
0.306800030649354
0.392565565343601
0.30198601690857
0.61596971441531
0.393991393648196
0.223862238622386
0.472660791299456
0.380330214432291
0.309012610554587
0.569843896766114
0.346567647338856
1
0.521963397775806
0.497651265512164
0.568732910669752
1
0.456090000805497
0.365271630281353
0.492646853634715
0.45666754029053
0.379132439432551
0.303972839032938
0.340201773158056
0.657730400540949
0.313287151012835
0.549735703988467
0.445585644761592
0.33765626741548
0.322341153998631
0.365481646820022
0.412399572428537
1
1
0.823323376988078
0.437228259474665
0.33709637663298
0.651967854935092
0.52999348534202
0.289281913818882
0.447737909516381
0.412977466564896
0.408107696866316
0.778530325406121
0.510117404796293
0.565085405405406
0.442165261102572
0.448070200378658
0.538385284722987
0.837874828916262
0.800787506673785
0.451015939269186
0.676549984511218
0.397945648107207
0.465375394597355
0.82493813224504
0.433555981129432
0.40267878355904
0.346666666666667
0.503434890749415
0.379627295023724
0.367327373794287
0.591677503250975
0.39700919193305
0.345198880445136
0.555004955401388
0.392184183665203
0.36168313124622
0.580862539837413
0.325286099181049
0.324872623699559
0.294566473988439
0.44518626167283
1
0.345657232095843
0.504974528263439
0.63067383544574
0.5761236833096
0.321028981961915
0.364949675675376
0.61876490587101
1
0.455283276029368
0.597656028837262
0.647338557449407
0.357774926426970
0.41301401777743
0.409486927350791
0.483111676914326
0.57548940038308
0.481393126752008
0.533854044536156
0.479652628111245
0.750304197010697
0.862339177023727
1
0.276428261461918
1
0.751772629554395
1
0.809683927370545
0.539457717479958
0.731884489431379
0.335454508011038
0.429720967928679
0.354151223128243
0.398390911479917
0.498303139601607
0.355229446664245
0.335318039858899
0.389059120020739
0.600910690637302
0.412845523186105
0.405044510385757
0.286532291711626
0.392049184116859
0.558035273353459
0.53085782883921
1
0.460811520939464
0.314246953167921
0.470360200290745
0.506309529565344
0.476688493062869
0.437631100034351
0.378517449417755
0.51422061318008
0.446700085279864
0.343945851090499
0.213143115700940
0.598985087637371
0.425838039063673
1
0.627046866724994
0.465805606809119
0.490010398098633
0.389875163125108
0.433046336497657
0.479782562622931
0.466555383331346
0.636496786728441
0.574742496237051
0.61587216328723
0.661152990164405
0.789098792195726
0.412062885906239
0.393088552915767
0.726887702060309
0.271894186449015
0.696732851109277
0.337254471332684
0.534070358617395
0.390951557729797
0.346242806986057
0.737289852136925
1
0.530655411759729
0.534466139119909
0.651847770277886
0.425105108405925
0.589279842157185
0.8081910876667
0.693380502074971
0.348956886680894
0.402591034607345
1
0.408852190279591
0.470031417912262
0.585036103856199
0.87760186450213
0.74567680714485
0.468562326883681
0.422553897180763
0.76843910806175
0.66264409221902
0.847826086956522
0.374384927360067
0.299798132048556
0.60561915678792
0.383230639120454
0.667338894490787
0.390961695957467
0.898400926998841
0.251352063676137
0.367242992555226
1
1
0.622990376252069
0.415814549608537
0.397305557288093
0.832456544057776
0.39156656919056
0.363711435555262
1
0.427628389214187
1
0.347397878205664
0.275976847828097
0.306212045532217
0.365035263945287
0.387950558803938
1
0.498685277566166
0.56611738566932
0.541145746023063
0.811967599369833
0.995802943732063
0.391974608932215
0.288787418053021
1
0.358592528608448
0.388258271893220
0.777330919576364
0.275127438917209
0.568938568654384
0.329104697290402
0.453973552445757
0.319971870604782
0.60195002955724
0.285049432203942
0.428192421284477
0.349349481984966
0.409979903589771
0.543938730726529
0.381476319989211
0.518133773490619
0.333995186522262
0.414707702739461
0.629334357890692
0.466767115633859
0.519743742023528
1
0.546920559357334
1
0.69464424229603
0.236586180713743
1
0.458864984790836
0.404520949588575
0.467265725288832
0.512424093495156
0.72588546408289
0.305834814620548
0.919396638995748
0.503970014533772
0.484177554654481
0.467487195168565
0.685745043509464
0.486411020104244
0.602002666212275
0.359340958605665
0.347578443033522
0.364566379911648
1
0.516375417239348
0.427392251986219
0.567814521897618
0.553891378589853
0.615049880795315
0.549373151148049
1
0.945426640299873
0.535827615043589
0.445583680444302
0.431230960171500
0.330043124101581
0.428990369603948
0.391892634635094
0.438795054849382
0.448897549329401
0.54485191917032
0.361406905453372
1
0.656928543229372
0.271254794520548
0.894149173738276
0.702052671988752
1
0.447900286452066
1
0.482359470387695
0.370466627288836
0.324570837360633
0.400630717831829
0.319793539884964
0.478674225904928
0.532526584336125
0.267758201340689
1
0.418215546645922
0.360594309280889
0.395602874191807
0.730397487937505
0.442887873084162
1
0.353801120306539
0.378864964354319
0.353138414648769
0.241913379456104
0.38673647469459
0.627907531550445
0.903282694681682
0.284608249714457
0.730482686253935
0.980337776637784
0.381268481081407
0.548707966402575
1
0.621174930453281
0.411590842404334
0.270258803563852
0.285414480587618
0.289424860853432
0.432054803811849
0.546508991211494
0.472651955707799
0.259388509518891
0.369246529098148
0.518948432760364
0.564365256124722
0.40599826496468
0.515915667631253
0.485839278827613
0.760013240648792
0.596061306864703
1
0.583901136124717
0.552014774848723
0.90310414192627
1
0.395363143527241
0.391961234603171
0.405644281168821
0.505021667091512
0.543080939947781
0.329916010392959
1
0.494630027405377
0.465948568395165
0.619953761337364
0.508298053860889
0.418270611893134
0.716290953525832
0.513190135482558
0.65753095717568
0.779799114982089
0.685337726523888
0.3426046474928
0.411125661941201
0.299502396593833
0.607273940607274
0.4204963069392
0.601554378496114
0.568772934392516
0.91869356316252
0.34083892961126
0.403249630723781
0.678266505465469
0.503532816889419
0.546878572315089
0.47472442091973
0.424209146225305
0.588659411744887
0.377173120466669
0.487151214174488
0.628431744290175
0.430522570894857
0.795763699961135
0.299204881364506
0.634589338921917
0.694710879693067
1
0.408597180494569
0.406983580397262
0.51516346325449
0.330400782013685
0.357302215473643
0.358513654678406
0.286817429674573
0.398391452498551
0.336511238227307
0.294101804470778
0.901213520760039
0.49433227619556
0.646711784411322
0.388128821065807
0.439775456380487
0.322777688474522
0.660125552197164
0.516525264659509
0.504330354379633
0.830604026845638
0.441737723402697
0.348747207793955
1
1
0.43884771718484
0.389481607743846
0.940890772703232
0.887243460764588
0.311377245508982
0.417155711356008
0.396950084227325
1
0.388225255972696
0.652877536545
0.448470559037042
0.694630051486699
0.441747572815534
0.567506616039581
0.416163067977657
0.77023577259447
0.479967542347094
0.326603858232391
0.432992332046191
0.580358888738475
0.307461285781323
0.361215392450789
0.756349084192704
0.450818762304803
0.481671007780504
0.429739791109292
0.449772000721155
0.70773922988944
0.585292789568167
0.505628203285913
1
0.745535487584
0.372629685616425
0.421566342287746
1
1
0.493359273670558
0.536691022964509
0.39426483817077
0.53117322095984
0.345388565758118
0.318815540037914
0.444571925571583
0.384308573037399
0.430114787305874
0.263985978766696
1
0.435011233806587
0.771332785122399
0.510754214656347
0.390592961459597
0.608902902991814
0.707139388052453
0.410489697618411
0.561078998073218
0.467994150073124
1
0.827842866988284
0.445270413324237
0.595877367840796
1
0.628073505305841
0.422181227054375
0.329721631885169
0.341552670558508
0.677394636015326
1
0.583094751192911
0.320475430583833
0.530913519496069
1
0.51238083050739
0.65199127152798
0.382243002337763
0.4894749614286
0.416574493795114
1
0.362987822418257
0.4764157295805
0.364867651784387
0.514621980845166
0.410239896957012
0.387503472760039
0.504898972496842
0.404264771212794
0.449236012134628
0.468281852021159
0.338929262097730
0.346083522270167
0.9120031497754
0.58906769837566
0.328586325504661
1
0.420736288504884
0.809402795425667
1
0.425378584992940
0.531426356836075
0.621930757505366
0.524912098773434
0.364572339371486
0.506325572720773
0.502736712875339
0.691407893629555
1
0.560311103909632
0.469298952457695
0.410238554470777
0.314089110865734
0.733042689269038
1
0.398880436342759
0.495755074744937
0.755830768660314
0.63796117943399
0.352740892066735
1
0.404333757264517
0.443311524626845
0.512536055025516
0.666088137639602
0.459496548031474
0.240661157024793
0.453748854262145
0.565222494064117
0.43637235509201
0.531802053955121
0.820035009465071
0.369207772795217
0.881199811053377
0.85140260618123
0.59370229947314
0.664134238626507
0.599292198799815
0.372737180949484
1
0.325435412074852
0.572765106070909
0.479355240862839
0.453720551052719
0.32821997105644
1
0.372453835903293
0.458630827383452
0.477348593228422
0.48535590802673
1
0.718970575420455
0.876145073845578
0.462420600858369
1
0.323817226041245
0.435111297774045
0.495430682481042
0.784222329117012
1
0.591117333866712
0.584530140432443
0.652774290735627
0.423107156595474
0.274509803921569
0.521166615934431
1
0.361508373059528
0.622769086541279
0.549426138467234
0.47951578447662
0.467744977836461
0.273097534833869
0.365217391304348
0.298424720373226
0.548358482618499
0.786670046291973
0.409387418459924
1
0.88057414724619
0.489455905021154
0.353877049936488
1
0.39203534744936
0.340819389377954
1
0.985414561897382
0.408718727264316
0.823816155988858
1
0.374542558807477
0.468130931628898
0.259902757471694
0.414389799635701
1
1
0.565150620200827
0.543871522498929
1
0.340061268385947
0.401713678582445
0.342032440716931
1
0.574834657262613
0.534867235726733
0.679145794885315
0.504803316816665
0.330495970945409
0.354158903655861
0.60184109393154
0.351302909141045
0.647235986960447
0.519336959763082
0.596783602389885
0.494075351260134
0.849616538846282
0.465898701773633
0.578064516129032
0.492519270226806
0.376743582656958
0.936575324842403
0.65264164475257
0.402436588775714
0.751093874303898
1
0.467912587758331
0.417182564750474
1
0.47444591572581
0.486004818251304
0.653016691545664
0.647874789607073
0.500702730181514
0.393488490398067
0.429892451502664
0.304238383563508
1
0.603972254104496
0.772723916414384
0.350112215453671
0.567743483607787
0.465246500304321
0.482357491798347
0.348230148968156
0.328936436910609
0.529052866954161
0.461949870824457
0.857030281480343
0.749656324899453
1
0.27176156482551
0.447896323222289
0.616653173817877
0.730249959334165
0.395848220106924
1
0.813613443142055
0.364342058140211
0.522363071035638
0.586528497409326
0.489579094895791
0.59994006592748
0.535585340521292
0.366340974332191
0.508155767817781
0.77230205420002
0.347121866770344
0.306215158211165
0.31624674196351
0.843139071620495
0.269204220491076
0.274577102230939
0.418094592119139
0.712505609716507
0.818025037753215
0.661531804413674
0.587179338699404
0.474599621146892
0.601209533973675
0.236402013313850
0.394599388981965
0.464487402258905
1
0.393849183631409
0.466048204137559
0.347936912537837
0.544501576225018
0.519195168583655
0.516149361903261
1
1
0.353414462435885
0.446078431372549
0.359022640663528
0.300602056582663
0.90041768610011
0.406008494260552
0.379375358635954
0.474364225341624
0.641068718398221
0.583934914632749
1
0.383959561216923
1
0.42176659271715
0.400628753375519
0.344918071024550
0.356127916633485
0.934831460674157
0.517821860428357
0.348032185301148
0.433268858800774
1
0.823253476294187
0.405571030640669
1
1
0.42185913023689
0.470496994765075
0.419079636644139
0.43545553104789
0.361071507492859
1
0.496163166397415
1
0.572864793761158
0.266691294175594
0.595911196294522
0.471869707258731
1
0.75301364110062
0.417597546101175
1
1
1
0.439494692833072
1
1
0.536432695229414
1
1
1
0.437521034665128
0.367416065250969
1
1
0.464301476829061
1
0.387509755863788
0.618198445358939
0.403115904079303
0.682463352206624
0.60693604951473
0.515468585608822
0.513930020358247
0.313951073200097
0.523237295497322
0.529320003877802
0.53188555791394
0.393755899045121
1
0.947034062693979
1
0.393387680426142
1
1
1
0.384667687946981
0.381689773616134
1
0.469873600517184
0.564146719476494
0.444149365680346
0.284542959385749
0.419051769533874
0.392156050262604
0.305593890882326
0.41982058949167
0.600206114737204
0.37204196260842
0.453255381344672
0.307079768928853
0.574305426067500
0.364331210191083
0.968085106382979
0.343233365880876
0.667889908256881
0.79688252550462
0.645104120513957
0.416378926854068
0.694895930001326
0.505581425950158
0.705770564215825
0.712862162317839
0.574905932085288
0.488798962009926
0.519028964621349
0.593875253566243
0.43839606754358
0.418587186106548
0.396919617285784
0.47488746097437
0.561261080352276
0.430430049147662
0.536033785931611
0.313494676216888
0.954496375134968
0.609170376628863
0.969064254740342
0.260621938717394
0.330194876286402
0.427642213675324
1
0.287795961742827
0.452832431789812
0.309751544175597
0.488498369658486
0.425063586773951
0.511514953067016
0.657049804897533
0.532757178700864
0.480831327423237
0.532415647366229
0.40861606730147
0.840182648401827
0.391201547610518
0.469194459688344
0.423385326488761
0.3314604564653
0.381150343243169
0.550802307619558
0.525281051431054
0.636250518457072
0.515985671321572
0.319968883702839
0.361111111111111
0.315889013909171
0.358913578279534
0.64182234083111
0.557445780221108
0.257779513151196
0.430976430976431
0.347680735478479
0.57077343125165
0.315817649827858
0.458433630925175
0.449111647291073
0.31970708684748
0.249132821484610
0.414634685164832
0.266005943722552
0.578290428172324
0.807660083782166
0.673300232471372
0.305372060928399
0.615369120757377
0.333887918773355
0.42843868090115
0.474022925846848
0.751553542075933
0.493343833202085
0.350308911305805
0.368115531643777
0.548437068947223
0.680646453853346
0.739858983710187
0.446286260758687
0.764502701266495
0.35681862338167
0.53444056772075
0.485227114462506
0.486323043386541
0.952717931318615
0.381364960711027
0.387624911678611
0.440024177152591
0.368069375010112
0.525423846436775
0.504418248897687
0.287876697841661
0.553450791288502
1
0.445933957614588
0.712805463371822
0.361467523266868
0.454414231654508
1
1
0.681306607419796
0.461529441081192
0.391987938832651
0.873115561688354
0.4516644322104
1
0.55689791611712
1
0.583711449786033
0.548663231774109
1
0.396697466444504
0.502956202284599
0.750797249193246
0.820579441573452
0.40289838534832
0.4004
0.4539855632326
0.307177261765494
0.417897550166347
0.566137324693499
0.442526417681697
0.435780330990232
0.545486600846262
0.877450875043878
0.51247693950869
0.809825877507493
0.505214930602345
0.424864573668931
1
0.409677157689812
0.405052765447498
0.283055311676910
0.682882744764203
0.399326778279741
0.397039109401411
0.323616966016023
0.383227048489953
1
0.753552649690296
0.394173230872892
0.36755230953706
0.853690893584763
0.342991156495823
0.461694571283612
0.367905665214048
0.579290517993737
1
1
0.38418778761311
0.93791830517749
0.432201377345049
0.406585513263107
0.550481717933836
1
0.470385526599182
0.641279709228308
0.756425404150623
1
0.515446306552543
0.445947688664314
1
0.329713824440799
0.526305886081277
0.454941459738637
0.52551424556024
0.461263920246063
0.589814814814815
0.512789679605195
1
0.742951907131012
0.634099925341453
0.761259536363369
0.50286637971543
0.709228853320834
0.357842409853094
0.479994447721831
0.441066584090098
0.431428782385333
0.672157758672518
0.371969157402533
0.403818517758161
0.866020929996275
0.749099639855942
1
1
0.371241115363587
0.626348644133791
0.790828499932106
0.574368222327776
0.267502207536958
0.627428597520605
0.505822757748336
1
0.482714835850384
1
0.362025316455696
0.577525351238244
0.619098738169507
0.420788979336256
0.672540566357889
0.625897457555537
0.613852906975564
0.514533443894729
0.681658667086317
0.454567809563301
0.484016807616616
0.964877402253148
0.429655952188661
0.43995734091717
0.372359470103831
0.494225421233437
0.499927714327020
0.522873907433107
1
0.886572980632971
0.449440653760711
0.388178886481137
0.600470454059448
0.429362567058745
0.410295853280112
0.651394287038184
0.681873820746742
0.668526788862965
0.816847393761775
0.524617960619741
0.44044355333688
0.521565960753837
0.717566806433444
0.337441504593913
0.777358911028988
0.40556220230705
0.442449046410739
0.587720416401105
0.65290692062675
0.472447717864631
0.489918537769697
0.865349315464763
0.285489354299412
0.61841261700218
0.476101498561232
0.556252155104856
0.401557430240104
0.459021911481318
0.470015146183621
0.976620153688748
0.622617100734702
0.303902160619649
0.545575663372932
0.304126655966921
0.471164881820457
0.458335354101441
1
0.42293144792465
0.787483583831898
1
0.433222095166974
1
0.546972395369546
0.544922355044129
0.760966140291933
0.415022168130053
0.860053523284619
0.684847258749747
0.488426702448843
0.487935656836461
0.511922265550086
0.337328297185484
0.99604987311045
0.446397810969256
0.483673273479616
0.494412802045405
1
0.561811912802758
0.69069134458356
0.304608174954439
0.438269017468868
0.461010423395013
0.286436787126837
0.443423964691401
0.447511401943288
0.544456198680167
0.413778517989796
0.450129743756082
0.64173621079779
0.753241726340236
0.310453367263878
0.465280589742972
0.641206313416009
0.731268859203291
0.428052890847809
0.438301659598974
0.284006569409861
0.331373446466923
0.972949726916957
0.334448823330706
0.523494531558835
1
0.460854673516849
0.399524838313037
0.506630225731349
0.406264947935192
0.472410048977347
0.428056598763325
1
0.386738995231843
0.493982713842124
0.432393347794649
0.364345975590266
0.330698103345894
0.624334230053984
0.262455761364159
1
0.44141159768114
0.637388807172375
0.278256845667804
0.423055284119511
0.381387634755367
0.468667454238953
0.496963166867154
0.860193273410136
0.375685245740115
0.539610026169695
0.266536665469287
0.452989282267486
0.256324142787498
0.5836996289473
0.366272946133012
0.558040757308752
0.527626383150134
0.69882525243149
0.244742902287741
0.477338696301211
0.475827025659407
0.801123537257231
0.88380159556018
0.414802020700492
0.522773023179159
1
1
0.721709644349815
0.373726534451466
0.301907658280343
0.780486016933622
0.399980020977973
0.421625279816753
0.57499704736034
0.58401808461014
0.502179944510503
0.626768682528037
0.355434528475747
0.764064897425698
0.526708074534162
0.808641881059623
1
1
0.58964852439567
0.738554082655676
0.578506163261788
0.537273827885301
0.391691394658754
0.306088423174976
0.368393671389662
0.393873813883802
0.38507560873701
0.52964197709813
0.597194853367335
0.570532915360502
0.733897389738974
0.329902935329201
0.416566366093802
0.481627695110841
0.837199148611035
0.567982862130068
0.603083952027413
0.485590654876943
0.534107014823337
0.713071711665956
0.245670941161064
0.516312056737589
0.875959829590388
0.544880518208045
0.649109658077689
0.454548564781553
1
0.669502606391325
0.632666053618165
0.494998230286321
0.942833169165664
0.458566629339306
0.66015493432132
0.414285864834389
1
0.33539190228524
0.394225026710621
1
0.445195714265279
0.737358352625807
0.342656684360477
0.468117157564096
0.383045287776946
0.316952168000559
0.684378172144632
0.848165569143932
0.381175311075521
0.671581678954198
0.474456216475794
0.390292547323832
0.698363882396359
0.481922196796339
1
0.621211277478782
1
0.686720469552458
0.671853867328592
0.29202396222155
0.652903749830784
0.475522074949938
1
0.896771383459465
1
0.3552285274451
0.607016532103037
0.675840978593272
0.415406562054208
0.574376028640752
0.549617737003058
0.351030045059275
0.479044340959708
0.67391463921898
1
0.388147330389402
0.366536820626971
0.435102134780722
0.606766136525113
0.678366205932598
0.453006770211071
0.323027886965329
0.544002687806107
0.465226075903396
0.362528839703067
0.558280145316929
0.915313618383876
0.488903947145519
0.276896933557864
0.327605333110074
0.608854531454598
0.340935290501076
0.535821842883574
0.525252525252525
0.27734963148797
0.435032497179997
0.686615793535111
0.396923167604845
0.724788281925717
1
0.81052250012946
0.569222032935832
1
1
1
0.640254627690761
0.376547246762821
0.604727135657346
0.902492140939461
1
0.390329353694025
0.541384695471109
1
1
1
0.281107350857862
0.365911114071688
0.568755571665083
1
0.92993037872956
0.887231251958664
0.685246932997798
0.457906810389482
0.461117022214646
0.481730553687514
0.703746855106969
0.348906960205312
0.725515358361775
0.384872313757344
0.323900265740107
0.323582668128841
0.392288348700754
0.616474210931486
0.430292374812789
0.407401549897201
0.34472577365533
0.371523929392169
0.86062182291051
0.472684444176003
0.501118142024449
0.969622766379881
0.275245755138517
0.531363942497504
0.65603495357728
0.350264150943396
0.264052230111451
0.476993280606697
0.747610556248553
0.363829598795501
0.433323630609854
0.379781482468462
0.520004488601542
0.486366110753699
0.801995060771876
1
0.470605395585671
0.513269033696145
1
0.388931900774214
0.490099794075717
0.623420105465807
0.688311807525312
0.911634997549954
0.799713876967096
0.483895452587976
0.75174944358671
0.386162286308971
0.538094519614238
0.718174580056316
0.375180776603807
1
0.441699980153667
0.454535583208461
0.450574414227299
0.503630759835495
0.373924774434694
0.595802724137259
0.380584974536933
0.717371823487592
0.368099820441054
0.604962849728039
0.464243418055935
0.221639973429773
0.416587468376457
0.53029052631579
0.546830563402904
0.431162452048989
0.523809179460108
1
0.638818523485488
0.580138693433256
0.322979815682098
0.465416255347154
0.518387239698715
0.519731412931838
0.754944059825315
0.421676216373701
0.412138745743302
0.630570652173913
1
0.382252559726962
1
0.454180808392471
0.427008129986401
0.299316921724169
0.468557149888313
0.428358769412333
1
0.322051923678449
0.493943688333913
0.482617393930243
1
0.395114561044559
0.537847666723988
0.91226590317374
0.464084319707431
0.650886251369052
0.524420372011506
0.574506880209999
0.580313833504067
0.473985687077971
0.343565511188063
0.479860132520853
0.769224442946613
0.514697148804036
0.784857997010463
0.57562714924026
0.3180485079838
0.29485621709194
0.847341147070277
0.754271010639812
1
1
1
1
1
1
0.919356548374009
0.799361149930126
1
1
1
1
0.468306200207828
0.530800849427184
0.437089999712853
0.579660884660753
[truncated: 1,286 more rows]
