# Supplementary material for: Estimating the Hidden Burden of Bovine Tuberculosis in Great Britain
Source: PLoS Comput Biol. 2012 Oct 18;8(10):e1002730. doi: 10.1371/journal.pcbi.1002730 (PMC3475695; doi:10.1371/journal.pcbi.1002730)
Supplement: Dataset S1 — Target and auxiliary distributions necessary for simulation and parameterization of models using ABC-SMC. (ZIP) [file pcbi.1002730.s001.zip › VE-6M.csv]

164
217
178
206
167
188
139
190
224
181
195
202
253
279
195
218
192
207
203
203
210
153
169
168
175
224
160
308
167
140
314
118
210
91
7
155
245
175
181
238
270
189
253
113
188
258
182
64
304
148
185
239
385
209
181
190
223
162
167
189
316
267
207
253
160
211
175
186
185
204
291
211
294
218
161
221
202
189
239
175
218
183
213
126
175
188
223
222
246
231
211
196
182
238
224
192
231
196
197
181
147
171
167
238
202
245
214
258
308
204
225
273
298
202
172
258
202
196
182
224
255
168
222
62
190
203
384
217
252
196
165
127
193
192
176
251
217
234
154
202
244
175
164
251
250
200
188
172
185
287
204
126
389
224
160
168
224
251
244
182
231
168
189
293
183
260
161
252
214
224
172
213
234
202
133
217
213
203
246
263
249
190
189
266
182
385
168
182
182
174
182
253
167
217
181
174
175
245
181
217
181
217
176
288
189
182
176
212
182
196
188
141
223
230
174
280
169
272
189
189
294
209
154
244
231
182
288
256
238
204
181
171
277
189
189
247
196
190
307
274
168
217
168
125
176
189
210
161
189
188
176
251
182
196
204
191
183
196
212
217
207
176
210
217
188
169
189
190
211
189
175
273
207
176
241
288
235
225
176
175
207
381
143
169
203
181
185
183
162
175
189
189
218
168
181
182
157
475
185
196
154
192
155
218
175
196
183
119
178
216
375
139
181
195
125
176
232
294
328
218
161
175
126
305
211
193
287
209
188
259
182
133
153
138
183
204
182
308
279
189
148
245
385
219
241
210
189
245
278
188
182
220
227
174
175
188
182
171
168
204
182
203
162
196
245
189
217
168
168
185
204
203
176
287
202
162
224
178
216
217
224
223
168
179
168
279
252
182
168
176
168
182
242
252
185
168
237
182
168
204
175
169
253
224
189
273
203
189
182
197
328
217
203
203
158
179
245
209
237
210
189
196
167
189
175
196
183
255
179
174
168
188
245
203
221
129
196
210
188
64
161
650
192
206
196
207
185
174
213
195
217
182
157
203
263
4
207
207
188
231
190
168
302
189
169
200
181
175
190
411
203
168
183
168
197
210
207
211
259
189
204
169
322
168
203
209
140
168
197
196
202
203
252
167
154
140
182
350
189
164
343
169
182
203
190
175
245
217
224
231
229
206
182
172
148
169
161
210
181
174
203
239
186
231
11
182
294
217
168
202
175
56
157
203
265
203
224
203
168
189
189
203
154
182
217
234
246
238
357
176
196
196
188
196
203
196
197
223
183
168
189
231
217
186
189
501
300
196
309
241
179
148
238
168
132
160
203
265
279
123
83
235
244
237
195
119
196
211
231
232
400
188
189
196
174
211
378
224
195
200
210
223
181
203
238
196
280
245
174
182
224
258
168
206
182
277
209
167
183
188
157
196
179
195
293
190
189
180
196
239
218
224
209
216
190
190
180
190
216
162
168
279
191
209
270
176
189
337
368
196
176
230
160
214
183
203
202
203
141
169
191
174
174
175
202
301
168
161
337
182
153
183
174
295
259
281
167
141
189
181
203
246
195
168
211
281
197
146
176
197
217
217
181
203
302
182
189
189
196
154
273
238
174
169
210
174
251
382
176
190
189
182
182
169
218
336
160
225
6
272
225
190
246
224
217
183
195
155
245
209
200
566
196
188
206
182
153
182
81
179
192
252
202
260
182
266
196
162
232
210
281
169
203
182
162
217
203
188
206
230
374
197
217
280
368
162
196
172
245
169
56
176
259
196
180
224
154
246
218
259
343
182
182
197
182
196
224
488
238
182
188
162
179
246
253
203
218
195
227
202
209
279
265
182
181
217
161
147
189
174
182
197
216
238
265
269
203
139
182
210
168
217
399
162
230
183
203
385
132
385
139
196
203
202
175
200
196
231
265
243
183
203
279
167
181
259
217
179
204
217
218
129
280
216
196
224
259
125
217
185
186
217
185
207
179
234
217
182
322
197
238
335
202
209
33
371
174
225
217
190
233
274
130
161
176
190
196
280
183
178
224
302
224
333
294
238
183
218
168
183
126
140
230
246
111
239
378
161
178
174
176
270
183
259
202
185
273
207
202
175
193
231
267
190
154
217
203
182
209
154
241
175
178
216
182
182
260
94
153
273
371
188
175
217
168
189
183
217
213
196
298
248
266
230
181
179
154
168
294
239
188
168
288
224
258
272
189
217
161
274
216
189
181
238
204
281
196
182
238
200
253
204
232
206
130
214
267
175
251
326
237
412
210
196
246
274
295
182
192
182
150
242
214
154
199
354
162
192
202
237
239
195
172
150
322
132
182
259
249
302
147
238
204
155
229
176
189
217
210
167
188
195
295
154
147
223
148
266
189
201
137
179
147
99
308
228
182
138
239
183
176
148
255
140
206
178
176
196
217
218
277
217
108
175
171
196
357
185
189
155
161
203
175
193
392
203
217
273
232
186
91
231
272
196
274
174
182
164
225
185
210
189
248
335
312
189
178
294
154
154
228
230
232
182
112
231
234
196
164
230
153
179
202
126
171
274
242
304
161
195
195
178
31
126
231
168
239
175
221
182
203
239
162
216
204
146
314
201
196
162
265
251
335
203
455
196
391
707
308
181
211
212
211
266
182
182
140
230
259
224
203
189
210
281
187
231
172
178
154
217
181
228
686
305
209
155
328
181
280
266
231
175
273
189
203
188
209
195
371
168
202
175
203
210
168
371
230
183
178
182
239
259
321
162
259
182
175
244
175
183
199
266
197
266
315
246
182
189
169
245
218
286
204
203
176
227
209
238
258
203
217
155
197
194
282
209
153
245
164
267
186
295
157
182
155
232
218
217
308
286
182
260
139
238
132
154
210
162
217
186
91
187
232
225
183
175
379
248
364
203
175
203
252
217
203
235
224
69
147
188
195
190
21
1
203
419
209
195
302
283
218
289
154
175
232
168
204
294
288
408
280
342
189
189
176
218
181
190
244
252
197
371
169
210
160
252
224
181
232
280
189
189
182
210
182
183
189
279
322
181
245
245
547
232
204
295
308
287
174
196
174
273
344
181
196
189
307
210
169
294
237
174
189
195
421
294
181
189
141
216
169
274
190
203
182
182
174
294
231
251
216
231
167
203
203
182
217
203
224
280
168
196
195
204
421
203
280
288
196
42
356
189
217
210
245
272
202
231
168
190
175
382
295
330
168
301
195
370
190
246
203
210
239
21
238
204
176
182
217
302
202
237
196
197
175
279
253
232
183
182
183
190
183
246
179
161
224
175
315
190
183
182
202
239
246
258
265
241
211
160
214
134
168
238
371
210
211
179
172
202
162
161
252
174
238
203
189
238
190
216
197
245
175
195
168
203
189
168
210
245
182
196
176
239
217
189
195
153
203
91
113
176
189
168
216
182
248
189
206
1
77
120
283
204
167
266
211
168
1
168
343
133
330
169
260
196
203
209
176
169
231
181
356
239
239
209
98
181
175
197
196
252
204
176
218
111
167
175
154
189
197
174
200
189
210
179
238
168
231
195
174
203
183
183
148
155
175
161
148
196
210
211
196
196
259
167
99
238
91
314
168
223
103
203
160
216
154
217
168
246
178
213
189
195
217
188
209
205
183
141
196
225
190
181
175
330
279
197
210
188
154
154
195
280
203
161
169
231
322
217
230
167
273
217
210
217
146
115
217
203
217
175
196
301
197
210
182
175
181
155
217
217
197
210
182
181
273
182
183
287
182
287
204
483
168
294
272
188
181
165
217
151
210
202
302
174
189
161
263
161
155
328
211
196
183
224
223
78
217
176
202
176
176
196
217
256
202
188
176
175
182
175
197
256
189
190
364
189
216
287
197
175
225
180
241
225
169
175
161
237
197
286
182
184
181
175
184
181
203
177
176
141
167
162
238
230
189
224
182
189
517
168
183
182
189
189
216
189
266
231
203
189
197
188
196
182
301
197
63
199
182
190
196
195
196
171
255
189
146
181
273
197
189
252
294
238
216
182
182
206
238
209
245
169
154
162
219
245
231
246
273
119
50
210
168
210
217
210
182
203
158
181
225
377
231
154
167
181
197
216
182
210
160
160
105
167
252
204
182
231
217
126
162
195
189
231
197
62
259
140
266
154
181
189
182
189
210
174
176
182
286
252
168
189
163
189
280
301
18
164
357
211
358
237
137
220
178
216
196
153
242
224
77
182
204
210
231
233
176
197
189
203
224
160
153
266
188
196
189
223
183
189
196
227
167
196
197
160
211
154
189
179
175
175
216
168
413
225
223
274
177
183
216
279
217
181
203
182
203
204
183
175
182
183
202
203
211
134
204
184
188
168
148
183
189
175
224
118
175
175
175
244
160
160
181
175
195
182
203
223
126
167
196
230
196
196
232
148
178
393
293
134
176
181
252
266
182
153
168
280
196
168
181
190
202
232
189
209
186
368
125
181
237
309
189
196
185
246
130
237
192
202
188
249
258
183
189
280
188
176
204
175
190
169
273
197
232
187
168
169
210
189
165
203
182
176
406
288
231
203
230
202
182
258
182
203
182
217
168
161
[truncated: 6,048 more rows]
