# Supplementary material for: Estimating the Hidden Burden of Bovine Tuberculosis in Great Britain
Source: PLoS Comput Biol. 2012 Oct 18;8(10):e1002730. doi: 10.1371/journal.pcbi.1002730 (PMC3475695; doi:10.1371/journal.pcbi.1002730)
Supplement: Dataset S1 — Target and auxiliary distributions necessary for simulation and parameterization of models using ABC-SMC. (ZIP) [file pcbi.1002730.s001.zip › VE-12M.csv]

595
631
406
392
329
385
315
372
420
388
371
323
316
371
364
379
315
406
407
470
386
379
409
328
543
465
231
330
372
421
349
371
605
366
385
364
405
385
357
377
350
314
343
339
357
266
434
368
690
358
365
363
365
378
353
335
385
371
420
349
364
357
358
315
300
356
336
363
349
354
356
351
364
357
318
364
335
322
341
349
371
357
427
391
371
371
370
360
356
400
693
283
357
357
316
575
363
293
483
364
349
336
364
328
335
398
356
336
420
309
357
310
328
407
549
259
358
615
714
396
368
351
315
308
371
421
8
356
350
385
379
426
357
371
490
364
358
393
350
371
303
357
469
350
368
385
609
364
140
357
357
378
288
234
357
343
364
364
383
413
357
393
384
350
420
349
343
365
441
367
392
371
384
357
364
378
377
343
356
344
343
328
343
325
365
438
305
855
574
386
910
238
392
361
336
384
365
552
329
363
360
330
364
377
428
336
154
377
372
378
371
395
386
371
356
364
378
359
361
350
491
385
393
357
364
182
384
407
329
364
358
567
342
356
371
407
388
392
792
350
445
371
556
371
377
431
301
371
343
357
316
363
196
371
526
385
392
601
363
354
314
384
616
434
369
412
378
266
360
347
364
339
351
372
293
371
371
337
274
357
363
329
434
342
356
384
364
357
350
357
350
350
339
379
203
368
420
336
385
437
420
357
350
385
370
346
357
657
307
399
470
371
361
371
463
449
342
322
429
379
406
323
365
260
406
350
351
372
370
364
347
342
350
431
358
354
987
454
378
378
525
357
371
378
330
337
371
385
362
322
381
385
382
385
359
364
321
363
182
363
373
370
273
446
392
427
364
371
364
314
386
224
336
343
623
1
347
330
371
371
337
363
370
427
427
358
364
364
490
441
350
371
359
365
329
363
385
359
370
378
356
361
398
303
348
339
357
414
357
364
392
332
358
366
364
351
370
364
357
357
442
349
385
342
329
350
384
364
560
364
386
204
371
427
364
364
358
349
407
539
364
315
329
385
391
399
414
386
371
348
365
358
385
420
357
358
356
357
351
343
351
367
377
364
364
393
426
358
364
337
316
357
378
371
363
365
364
379
364
372
427
371
336
358
365
364
364
426
399
406
330
392
371
300
378
357
363
333
370
448
371
328
322
343
441
364
385
358
507
385
318
357
398
402
619
280
364
7
351
377
377
364
321
532
368
301
434
375
371
323
356
358
357
363
328
365
302
399
322
365
389
489
357
343
364
400
343
336
343
350
370
364
330
336
371
526
371
365
364
371
385
399
829
365
364
507
350
389
238
382
372
384
575
311
332
434
364
336
379
284
399
370
371
336
336
365
371
365
363
392
213
202
365
357
357
445
315
363
475
343
434
393
374
298
363
356
367
358
623
323
336
332
281
343
228
371
371
356
396
818
374
1029
371
335
318
364
402
364
315
414
263
448
364
493
357
378
347
357
420
343
379
354
440
330
378
444
332
358
378
371
344
356
318
403
385
322
337
34
322
371
357
363
385
371
372
330
356
413
351
377
371
388
329
358
342
370
363
377
189
329
328
350
406
363
329
374
405
321
169
328
469
392
546
378
328
356
339
406
455
364
413
406
386
358
371
392
360
357
385
315
351
336
406
351
371
365
336
370
360
358
561
448
357
399
392
329
365
666
678
371
363
356
252
462
322
368
343
364
385
364
356
441
364
364
294
280
253
426
308
343
300
372
651
800
505
344
342
329
357
371
307
322
370
182
385
449
295
350
371
419
280
378
379
336
533
414
378
434
413
400
386
455
380
616
392
363
356
377
336
364
386
350
307
356
372
357
447
430
413
400
379
420
444
357
413
385
350
357
357
329
490
368
544
405
315
358
358
399
330
344
518
230
418
384
350
357
43
329
1
375
384
469
308
63
321
363
357
350
343
371
294
356
336
393
350
244
378
350
370
343
386
350
357
56
379
371
343
364
399
343
175
211
342
372
414
7
386
392
360
553
370
364
351
350
392
359
532
435
434
378
365
364
343
371
427
364
280
293
365
483
378
356
384
540
372
372
446
322
370
400
441
351
827
644
405
343
529
393
357
343
370
583
482
365
372
433
363
384
357
358
383
369
406
357
6
375
420
344
1030
371
308
349
365
357
336
370
332
378
351
350
354
351
393
350
370
343
602
364
370
363
371
365
364
351
364
365
322
351
343
385
383
364
329
470
378
371
357
335
357
615
391
358
574
386
407
448
442
125
385
321
406
372
378
329
330
365
349
356
392
350
405
336
363
328
364
364
300
317
372
455
357
336
378
364
322
385
377
736
382
371
350
335
377
364
342
357
372
363
426
344
356
295
392
371
275
143
344
364
286
357
365
385
365
358
365
277
174
332
363
441
367
399
372
392
378
358
829
553
349
350
378
364
407
510
359
349
363
378
350
365
362
372
357
364
348
364
371
351
356
364
392
294
357
308
378
378
364
392
364
204
364
371
370
378
406
364
385
365
371
370
364
363
385
336
350
357
363
379
378
420
398
365
350
315
372
364
342
378
378
336
315
335
357
867
398
370
421
358
370
357
386
421
189
343
574
344
896
349
365
356
358
350
378
384
309
343
340
364
357
357
400
909
336
365
322
364
391
399
350
459
439
357
381
349
420
364
365
265
350
386
377
364
519
425
372
379
386
594
364
308
392
643
329
448
364
410
365
364
386
335
378
279
371
370
349
540
378
357
421
343
364
364
1081
378
378
476
392
336
371
351
364
323
407
392
309
342
396
195
392
386
356
166
385
441
385
385
370
406
369
353
330
357
714
392
398
358
342
715
371
385
364
392
343
342
364
385
384
510
379
377
385
357
309
480
392
371
329
386
512
343
350
285
350
364
420
359
462
413
391
364
323
379
371
277
371
343
371
377
351
372
370
468
325
386
382
400
434
413
351
364
365
300
359
321
357
489
385
440
311
336
364
358
364
538
342
690
329
371
168
392
652
350
553
339
319
349
379
389
403
412
350
517
382
367
1
360
1
340
429
343
372
371
288
343
364
358
397
382
372
484
328
407
347
193
364
218
429
399
304
349
360
384
350
448
365
370
603
371
389
378
374
441
420
350
489
700
959
377
398
328
532
7
343
344
321
336
372
301
378
307
364
419
386
351
378
295
357
336
371
342
292
368
463
386
431
346
354
329
328
370
420
357
168
371
378
343
574
365
399
349
363
365
497
372
119
363
393
342
407
381
349
385
349
420
427
349
472
372
864
455
426
484
371
392
393
399
364
186
385
364
413
371
462
461
370
371
503
332
414
426
357
406
342
349
371
358
392
438
350
392
658
315
416
392
381
357
361
382
344
441
378
360
392
379
343
349
357
421
372
448
372
413
395
612
377
378
372
336
349
356
392
348
441
397
427
360
309
364
357
385
441
469
392
357
498
387
364
455
358
343
442
390
358
333
343
363
412
416
342
378
329
371
413
308
454
300
350
483
330
413
365
364
377
616
399
7
1
12
356
420
483
419
364
632
386
382
350
357
979
356
442
374
351
385
475
356
358
343
428
392
309
370
420
351
307
447
314
356
351
365
335
350
427
355
371
371
350
385
700
328
274
367
378
371
433
329
350
441
393
427
406
368
372
384
459
189
392
336
287
358
388
381
400
700
385
357
351
322
407
413
392
378
266
441
356
379
428
364
428
398
336
393
552
353
371
308
322
392
329
308
380
372
364
347
364
353
463
427
358
358
293
378
426
356
357
357
445
370
294
358
399
398
363
357
388
372
356
356
357
370
589
335
364
354
375
294
358
563
325
574
370
427
308
377
406
420
386
679
367
377
524
365
393
419
400
421
392
371
371
357
365
377
371
371
385
337
378
360
343
350
615
358
421
314
221
364
357
433
364
370
413
335
420
381
404
384
364
405
378
379
379
323
377
462
364
371
376
364
414
386
293
745
328
363
371
344
371
350
427
406
419
372
378
420
375
360
396
378
322
454
371
392
364
393
363
377
574
349
433
427
364
371
485
462
371
357
399
344
398
374
463
358
357
370
330
420
365
428
356
406
335
306
358
371
616
364
329
336
426
364
379
365
350
365
336
365
357
260
336
406
358
336
372
428
378
371
354
392
406
308
391
14
379
371
412
385
392
63
519
535
323
400
308
307
421
343
490
343
351
371
413
358
323
358
357
385
371
343
634
337
338
371
349
353
371
356
455
343
357
350
364
364
245
360
358
252
357
349
335
328
511
323
224
315
379
385
357
392
448
364
371
721
384
356
328
339
365
342
422
329
351
379
15
595
371
603
363
370
374
378
399
307
413
386
364
361
381
344
371
868
329
364
343
658
343
349
364
357
329
309
371
351
363
365
385
364
356
379
357
386
1
262
342
364
343
363
378
399
357
304
347
337
385
378
370
357
358
363
350
406
364
385
335
378
90
356
343
385
385
322
351
365
372
357
343
392
351
630
364
357
378
371
455
322
350
371
413
351
343
349
357
350
329
393
378
399
316
112
210
427
315
539
372
372
329
342
384
428
357
357
370
392
363
343
511
300
424
368
370
371
351
385
378
280
356
350
349
357
350
351
[truncated: 2,261 more rows]
