# Supplementary material for: Estimating the Hidden Burden of Bovine Tuberculosis in Great Britain
Source: PLOS journal article supplement (doi:10.1371/journal.pcbi.1002730), 2012-10-18

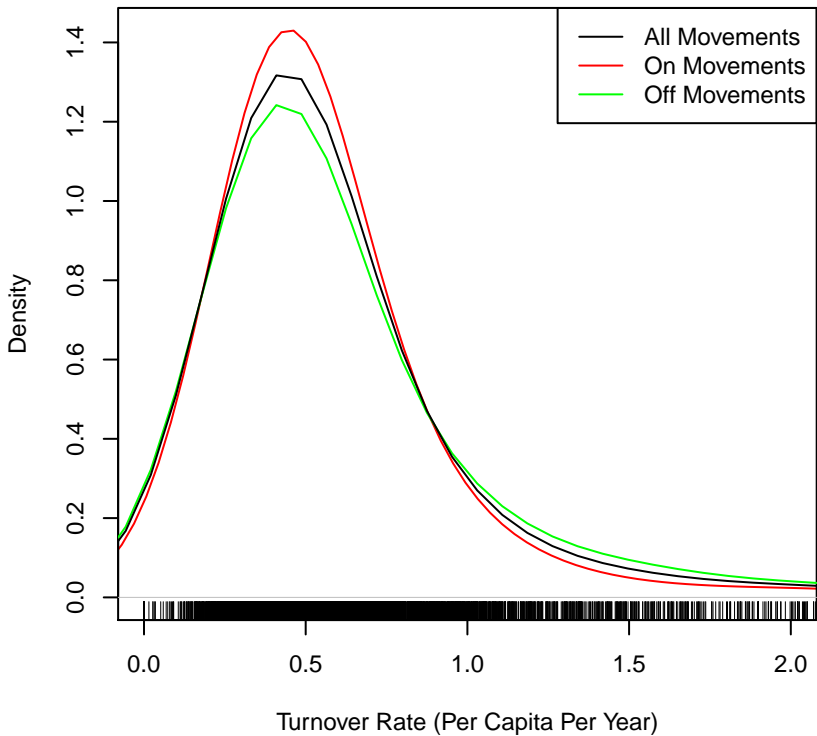

Supplement: S4 (10.1371/journal.pcbi.1002730.s004) [file journal.pcbi.1002730.s004]
