# Supplementary material for: Estimating the Hidden Burden of Bovine Tuberculosis in Great Britain
Source: PLOS journal article supplement (doi:10.1371/journal.pcbi.1002730), 2012-10-18

**PTI 1****PTI 2****PTI 4**

Probability of Infection Remaining

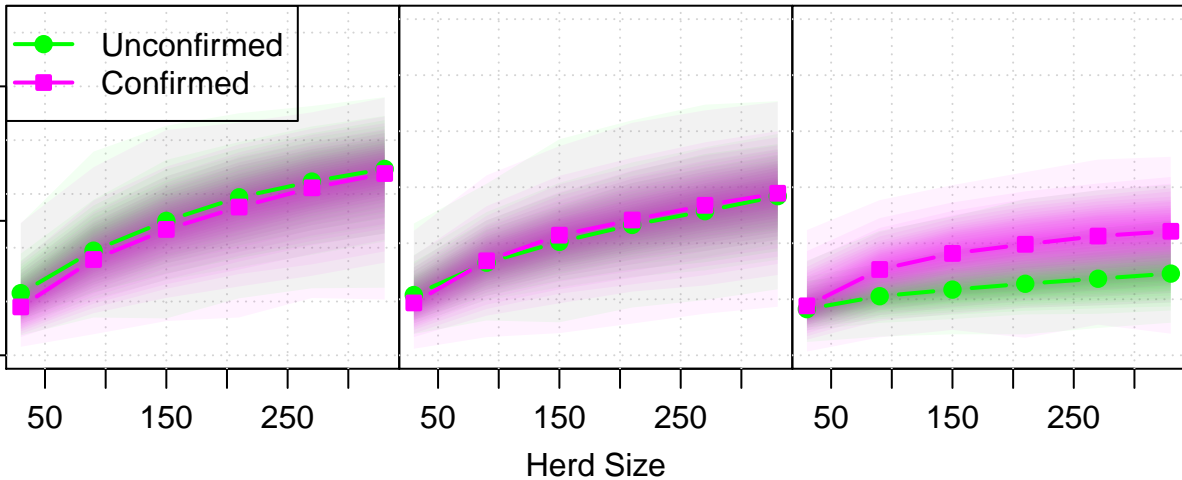

Supplement: S9 (10.1371/journal.pcbi.1002730.s009) [file journal.pcbi.1002730.s009]
